# Supplementary material for: Large Deletion in KCNQ1 Identified in a Family with Jervell and Lange-Nielsen Syndrome
Source: PubMed Central journal article supplement — Ann Lab Med. 2014 Aug 21;34(5):395–8. doi: 10.3343/alm.2014.34.5.395 (PMC4151011; doi:10.3343/alm.2014.34.5.395), 2014-08-21
Supplement: alm-34-395-s001.pdf [file alm-34-395-s001.pdf]

**Table S1.** LQTS patients with large exon(s) deletion discovered in our laboratory

| Age   | Gender | Diagnosis                          | Symptom      | Family Hx | QTc (ms) | Schwartz score | Sequence mutation | Deletion  |
|-------|--------|------------------------------------|--------------|-----------|----------|----------------|-------------------|-----------|
| 10 yr | M      | Romano-Ward syndrome               | -            | -         | 460      | 2              | -                 | Exon 11   |
| 19 yr | M      | Romano-Ward syndrome               | syncope      | +         | 516      | 5              | -                 | Exon 8    |
| 14 mo | M      | Jervell and Lange-Nielsen syndrome | Hearing loss | +         | 546      | 3.5            | +                 | Exon 7-10 |
